# Supplementary material for: Tissue Adhesive, Self-Healing, Biocompatible, Hemostasis, and Antibacterial Properties of Fungal-Derived Carboxymethyl Chitosan-Polydopamine Hydrogels
Source: MDPI journal article supplement (doi:10.3390/pharmaceutics14051028), 2022-05-10
Supplement: s1 [file s1]

## Supporting Information

# **Tissue adhesive, self-healing, biocompatible, hemostasis, and antibacterial properties of fungal-derived carboxymethyl chitosan-polydopamine hydrogels**

**Kummara Madhusudana Rao <sup>1,2</sup>, Kannan Badri Narayanan <sup>1,2</sup>, Uluvangada Thammaiah <sup>1</sup>, Pil-Hoon Park <sup>2,3</sup>, Inho Choi<sup>2,4</sup> and Sung Soo Han <sup>1,2,\*</sup>**

<sup>1</sup> School of Chemical Engineering, Yeungnam University, Gyeongsan 38541, Republic of Korea; msraochem@yu.ac.kr (K.M. Rao); okbadri@gmail.com (K.B.N); sanjuuthappa@gmail.com (U.T.U)

<sup>2</sup> Research Institute of Cell Culture, Yeungnam University, Gyeongsan, Gyeongbuk, 38541, Republic of Korea.

<sup>3</sup> School of Pharmacy, Yeungnam University, Gyeongsan 38541, Republic of Korea; parkp@yu.ac.kr (P.H.P)

<sup>4</sup> Department of Medical Biotechnology, Yeungnam University, Gyeongsan 38541, Republic of Korea; inhochoi@ynu.ac.kr (I.C)

\* Correspondence: sshan@yu.ac.kr (S.S.H)

**Table S1:** Formulations of hydrogels

| Formulations | DA/AAm<br>(Wt %) | DA<br>(mg) | FCMCS<br>(g) | AM<br>(g) | BIS<br>(mg) | APS (mg) | TEMED (μL) |
|--------------|------------------|------------|--------------|-----------|-------------|----------|------------|
| FCMCS        | 0                | 0          | 0.25         | 2         | 5.0         | 50       | 10         |
| 0.2DA-FCMCS  | 0.2              | 4          | 0.25         | 2         | 5.0         | 200      | 10         |
| 0.4DA-FCMCS  | 0.4              | 8          | 0.25         | 2         | 5.0         | 200      | 10         |

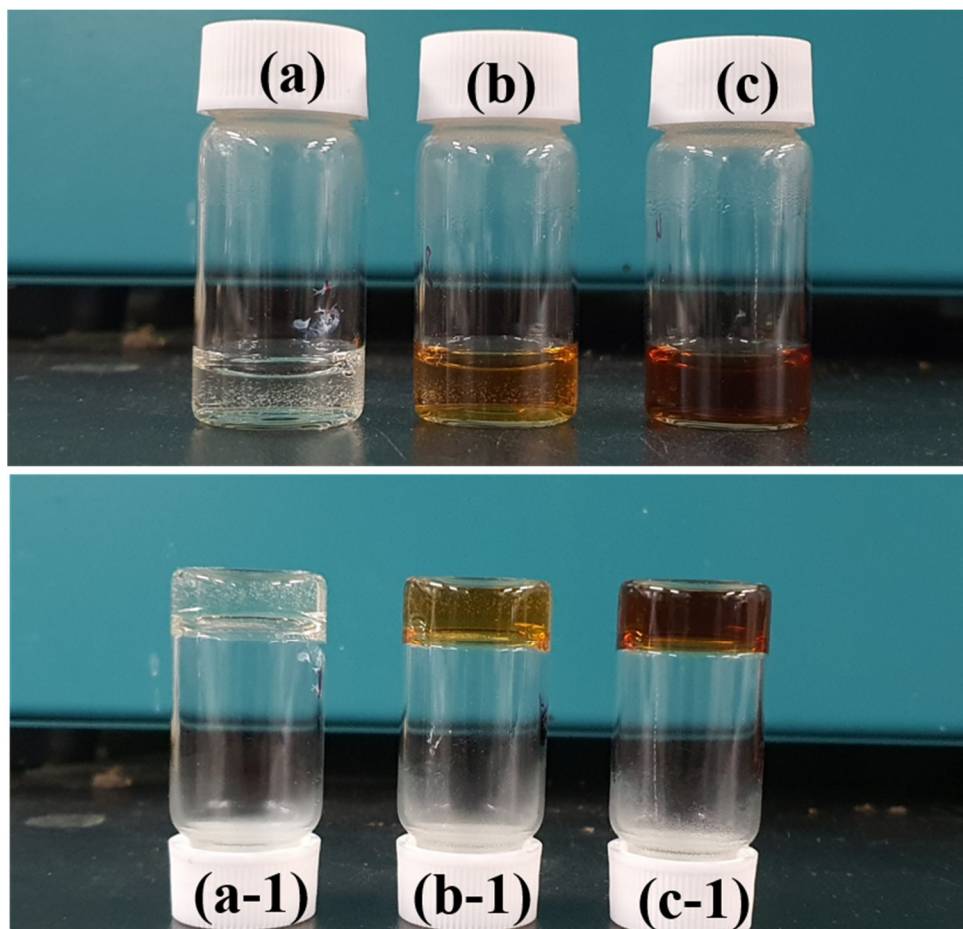

Figure S1. Digital photographs of hydrogel formulations (a) and (a-1) FCMCS (b) and (b-1) 0.2DA-FCMCS, (c) and (c-1) 0.4DA-FCMCS.

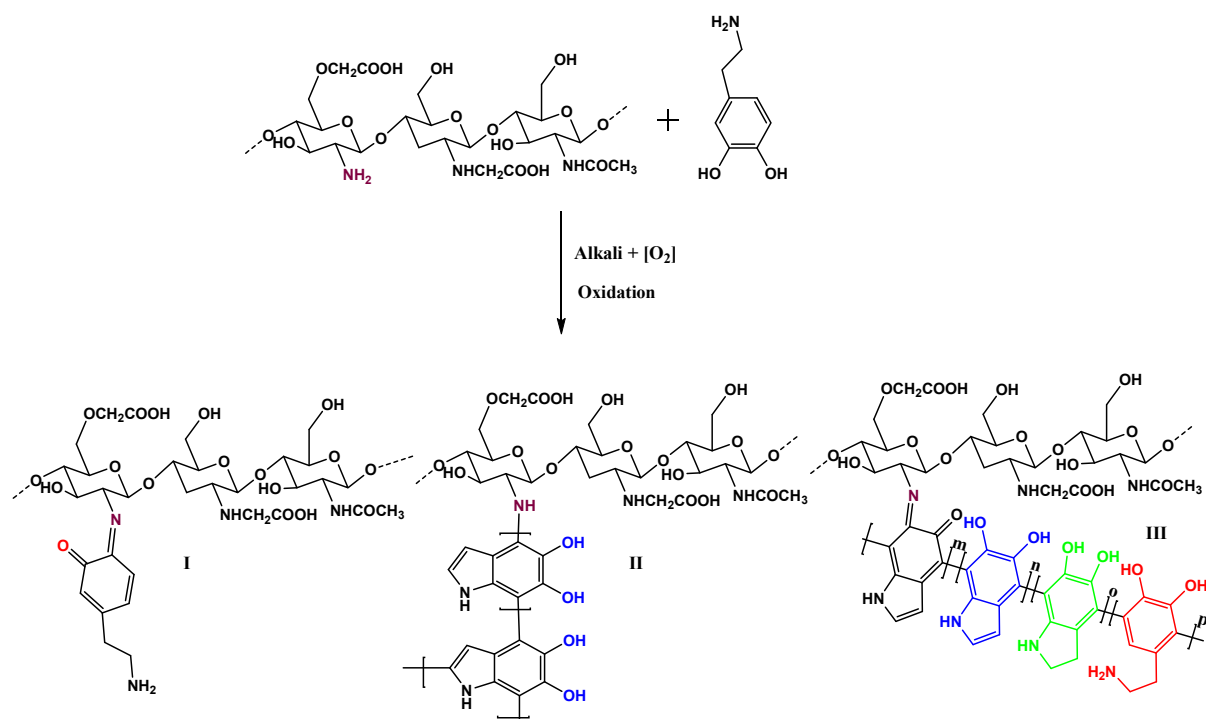

**Scheme S1:** Schematic representation of possible chemistry of FCMCS-PDA reaction
